# Supplementary material
Source: Springer Nature journal article supplement (https://www.springermedizin.de/resource/supplementary/12936_2014_3276_MOESM4_ESM.pdf/9545398)

# splenomegaly

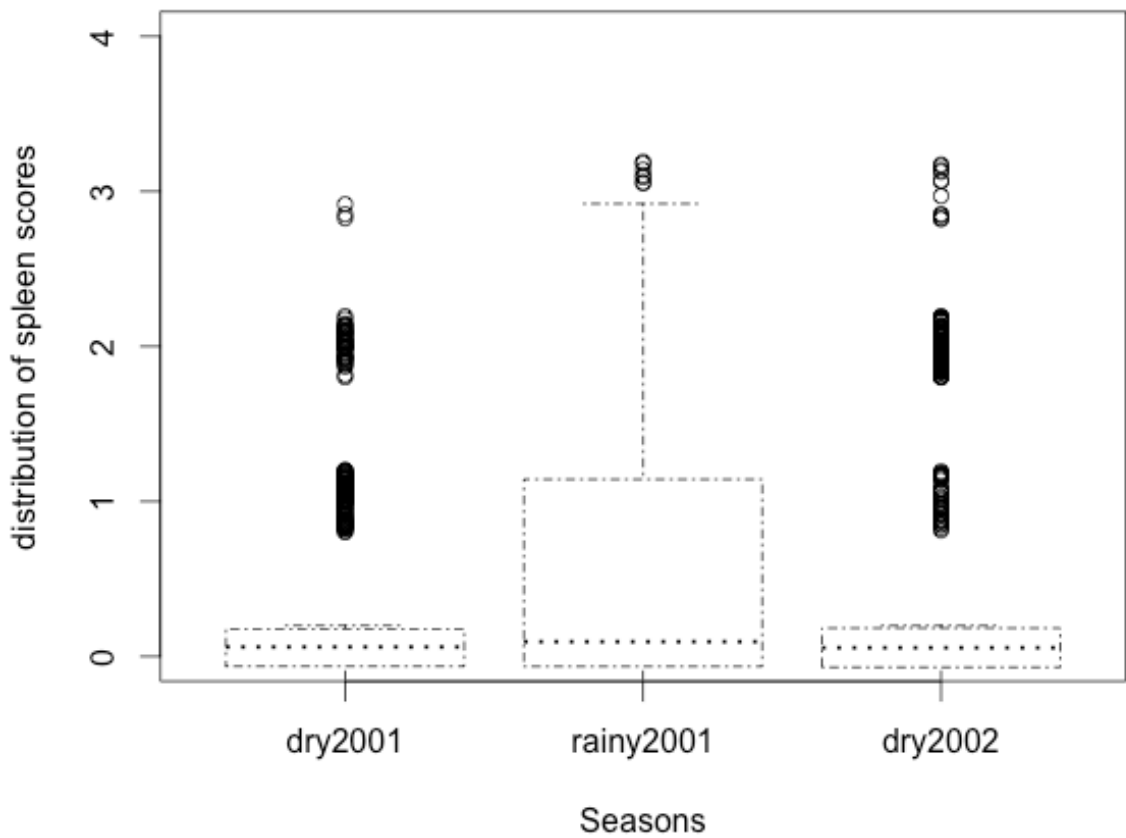

Supplement: MOESM4 [file 9545398]
